# Supplementary material for: Detection and distinction of amino acids and post-translational modifications with gold nanojunctions
Source: Royal Society of Chemistry journal article supplement (doi:10.1039/d4nr03359k), 2025-01-01
Supplement: d4nr03359k1.pdf [file d4nr03359k1.pdf]

# Journal Name

## ARTICLE TYPE

Cite this: DOI: 00.0000/xxxxxxxxxx

## Supplementary material for: Detection and distinction of amino acids and post-translational modifications with gold nanojunctions

Rodrigo G. Amorim<sup>a\*</sup>, Filipe C. D. A. Lima<sup>b</sup>, Fábio Arthur Leão de Souza<sup>c</sup>, Wanderlã L. Scopel<sup>d</sup>, Jariyane Prasongkit<sup>e</sup> and Ralph H. Scheicher<sup>f</sup>

### 1 Sensitivities maps

<sup>a</sup> Departamento de Física, ICEx, Universidade Federal Fluminense - UFF, Volta Redonda/RJ, Brazil; E-mail: rgamorim@id.uff.br

<sup>b</sup> Federal Institute of Education, Science and Technology of São Paulo, Matão/SP, Brazil.

<sup>c</sup> Federal Institute of Education, Science and Technology of Espírito Santo, Matão/SP,

Brazil.

<sup>d</sup> Departamento de Física, Universidade Federal do Espírito Santo-UFES, Vitória/ES, Brazil.

<sup>e</sup> Division of Physics, Faculty of Science, Nakhon Phanom University, Nakhon Phanom 48000, Thailand.

<sup>f</sup> Division of Materials Theory, Department of Physics and Astronomy, Uppsala University, Sweden.

|    | A  | C  | D   | E  | F | G  | H | K | I  | L  | M | N  | P  | pS | pT | pY | Q  | R  | S  | T | V | W | Y |
|----|----|----|-----|----|---|----|---|---|----|----|---|----|----|----|----|----|----|----|----|---|---|---|---|
| A  | 0  | 2  | 5   | 1  | 1 | 1  | 1 | 1 | 0  | 0  | 1 | 0  | 0  | 0  | 1  | 1  | 0  | 0  | 1  | 1 | 1 | 1 | 1 |
| C  | 1  | 0  | 1   | 1  | 1 | 0  | 1 | 1 | 1  | 1  | 1 | 1  | 1  | 1  | 1  | 1  | 1  | 1  | 1  | 1 | 1 | 1 | 1 |
| D  | 1  | 1  | 0   | 1  | 1 | 1  | 1 | 1 | 1  | 1  | 1 | 1  | 1  | 1  | 1  | 1  | 1  | 1  | 1  | 1 | 1 | 1 | 1 |
| E  | 1  | 5  | 10  | 0  | 1 | 3  | 1 | 1 | 1  | 0  | 1 | 1  | 1  | 1  | 1  | 1  | 2  | 1  | 2  | 1 | 0 | 1 | 1 |
| F  | 20 | 54 | 100 | 11 | 0 | 34 | 0 | 4 | 16 | 13 | 2 | 21 | 20 | 23 | 6  | 0  | 28 | 15 | 32 | 6 | 7 | 0 | 1 |
| G  | 1  | 1  | 3   | 1  | 1 | 0  | 1 | 1 | 1  | 1  | 1 | 1  | 1  | 0  | 1  | 1  | 0  | 1  | 0  | 1 | 1 | 1 | 1 |
| H  | 16 | 42 | 78  | 8  | 0 | 26 | 0 | 3 | 13 | 10 | 1 | 16 | 15 | 17 | 5  | 0  | 21 | 12 | 25 | 5 | 5 | 0 | 0 |
| K  | 4  | 13 | 24  | 2  | 1 | 8  | 1 | 0 | 3  | 2  | 1 | 4  | 4  | 5  | 1  | 1  | 6  | 3  | 7  | 1 | 1 | 1 | 1 |
| I  | 0  | 3  | 7   | 0  | 1 | 1  | 1 | 1 | 0  | 0  | 1 | 0  | 0  | 1  | 1  | 1  | 1  | 0  | 1  | 1 | 1 | 1 | 1 |
| L  | 1  | 4  | 9   | 0  | 1 | 2  | 1 | 1 | 0  | 0  | 1 | 1  | 1  | 1  | 1  | 1  | 1  | 0  | 2  | 1 | 1 | 1 | 1 |
| M  | 8  | 21 | 41  | 4  | 1 | 13 | 1 | 1 | 6  | 5  | 0 | 8  | 8  | 9  | 2  | 1  | 11 | 6  | 12 | 2 | 2 | 1 | 0 |
| N  | 0  | 2  | 5   | 1  | 1 | 1  | 1 | 1 | 0  | 1  | 1 | 0  | 0  | 0  | 1  | 1  | 0  | 0  | 1  | 1 | 1 | 1 | 1 |
| P  | 0  | 2  | 5   | 1  | 1 | 1  | 1 | 1 | 0  | 0  | 1 | 0  | 0  | 0  | 1  | 1  | 0  | 0  | 1  | 1 | 1 | 1 | 1 |
| pS | 0  | 2  | 5   | 1  | 1 | 1  | 1 | 1 | 0  | 1  | 1 | 0  | 0  | 0  | 1  | 1  | 0  | 0  | 1  | 1 | 1 | 1 | 1 |
| pT | 3  | 9  | 17  | 1  | 1 | 5  | 1 | 0 | 2  | 1  | 1 | 3  | 2  | 3  | 0  | 1  | 4  | 2  | 5  | 0 | 0 | 1 | 1 |
| pY | 15 | 39 | 74  | 8  | 0 | 25 | 0 | 3 | 12 | 9  | 1 | 15 | 15 | 16 | 4  | 0  | 20 | 11 | 23 | 4 | 5 | 0 | 0 |
| Q  | 0  | 1  | 4   | 1  | 1 | 0  | 1 | 1 | 1  | 1  | 1 | 0  | 0  | 0  | 1  | 1  | 0  | 1  | 0  | 1 | 1 | 1 | 1 |
| R  | 0  | 3  | 7   | 0  | 1 | 2  | 1 | 1 | 0  | 0  | 1 | 0  | 0  | 1  | 1  | 1  | 1  | 0  | 1  | 1 | 1 | 1 | 1 |
| S  | 0  | 1  | 3   | 1  | 1 | 0  | 1 | 1 | 1  | 1  | 1 | 0  | 1  | 0  | 1  | 1  | 0  | 1  | 0  | 1 | 1 | 1 | 1 |
| T  | 3  | 9  | 17  | 1  | 1 | 5  | 1 | 0 | 2  | 1  | 1 | 3  | 3  | 3  | 0  | 1  | 4  | 2  | 5  | 0 | 0 | 1 | 1 |
| V  | 2  | 8  | 16  | 1  | 1 | 5  | 1 | 0 | 2  | 1  | 1 | 2  | 2  | 3  | 0  | 1  | 4  | 2  | 4  | 0 | 0 | 1 | 1 |
| W  | 17 | 44 | 82  | 9  | 0 | 28 | 0 | 3 | 13 | 10 | 1 | 17 | 16 | 19 | 5  | 0  | 23 | 13 | 26 | 5 | 5 | 0 | 1 |
| Y  | 12 | 31 | 59  | 6  | 1 | 20 | 0 | 2 | 9  | 7  | 1 | 12 | 11 | 13 | 3  | 0  | 16 | 9  | 18 | 3 | 3 | 0 | 0 |

Fig. 1 We depicted the amino acid sensitivity for 7.0 Å device. In this table, we calculate the sensitivity using one amino acid as a reference. In the row, we have the reference amino acid and in the column the other. For 7.0 Å device the F is the best one.

|    | A  | C  | D   | E  | F  | G  | H  | K  | I  | L  | M  | N  | P  | pS | pT | pY | Q  | R  | S  | T  | V  | W  | Y  |
|----|----|----|-----|----|----|----|----|----|----|----|----|----|----|----|----|----|----|----|----|----|----|----|----|
| A  | 0  | 8  | 6   | 11 | 5  | 3  | 2  | 7  | 11 | 11 | 15 | 3  | 4  | 7  | 15 | 12 | 6  | 9  | 1  | 5  | 7  | 12 | 7  |
| C  | 14 | 0  | 24  | 5  | 6  | 19 | 11 | 3  | 5  | 5  | 12 | 9  | 7  | 3  | 11 | 6  | 3  | 2  | 12 | 5  | 2  | 6  | 3  |
| D  | 5  | 11 | 0   | 13 | 8  | 2  | 6  | 10 | 13 | 13 | 16 | 7  | 8  | 10 | 16 | 14 | 9  | 12 | 5  | 9  | 10 | 14 | 10 |
| E  | 24 | 6  | 38  | 0  | 13 | 31 | 20 | 9  | 0  | 0  | 10 | 18 | 14 | 10 | 9  | 2  | 10 | 3  | 22 | 12 | 9  | 2  | 9  |
| F  | 7  | 4  | 15  | 8  | 0  | 11 | 4  | 2  | 8  | 8  | 14 | 3  | 1  | 2  | 13 | 9  | 2  | 6  | 5  | 1  | 3  | 9  | 2  |
| G  | 3  | 10 | 2   | 12 | 7  | 0  | 4  | 8  | 12 | 12 | 16 | 5  | 6  | 8  | 16 | 13 | 8  | 11 | 4  | 7  | 9  | 13 | 8  |
| H  | 2  | 7  | 9   | 10 | 3  | 5  | 0  | 5  | 10 | 10 | 15 | 1  | 3  | 5  | 14 | 11 | 5  | 8  | 1  | 4  | 6  | 11 | 5  |
| K  | 10 | 2  | 19  | 6  | 3  | 15 | 7  | 0  | 6  | 6  | 13 | 6  | 3  | 0  | 12 | 8  | 0  | 4  | 9  | 2  | 0  | 8  | 0  |
| I  | 24 | 6  | 38  | 0  | 13 | 31 | 20 | 9  | 0  | 0  | 10 | 18 | 15 | 10 | 9  | 2  | 10 | 3  | 22 | 12 | 9  | 2  | 10 |
| L  | 24 | 6  | 38  | 0  | 13 | 32 | 20 | 10 | 0  | 0  | 10 | 18 | 15 | 10 | 9  | 2  | 10 | 3  | 22 | 12 | 9  | 2  | 10 |
| M  | 72 | 34 | 100 | 21 | 49 | 87 | 63 | 41 | 21 | 21 | 0  | 58 | 51 | 41 | 3  | 17 | 42 | 28 | 67 | 47 | 40 | 17 | 41 |
| N  | 3  | 6  | 11  | 9  | 2  | 7  | 1  | 4  | 9  | 9  | 15 | 0  | 2  | 4  | 14 | 10 | 4  | 8  | 2  | 3  | 5  | 10 | 4  |
| P  | 6  | 5  | 13  | 8  | 1  | 10 | 3  | 3  | 8  | 8  | 14 | 2  | 0  | 3  | 14 | 9  | 3  | 6  | 4  | 1  | 3  | 9  | 3  |
| pS | 10 | 2  | 19  | 6  | 2  | 15 | 7  | 0  | 6  | 6  | 13 | 6  | 3  | 0  | 12 | 8  | 0  | 4  | 8  | 2  | 0  | 8  | 0  |
| pT | 61 | 28 | 86  | 17 | 41 | 75 | 54 | 34 | 17 | 16 | 2  | 49 | 43 | 34 | 0  | 13 | 35 | 23 | 57 | 39 | 33 | 13 | 34 |
| pY | 29 | 9  | 44  | 2  | 17 | 37 | 24 | 12 | 2  | 2  | 9  | 22 | 18 | 13 | 8  | 0  | 13 | 6  | 26 | 16 | 12 | 0  | 13 |
| Q  | 9  | 3  | 18  | 7  | 2  | 14 | 7  | 0  | 7  | 7  | 13 | 5  | 3  | 0  | 13 | 8  | 0  | 4  | 8  | 1  | 1  | 8  | 0  |
| R  | 18 | 2  | 30  | 3  | 8  | 24 | 15 | 5  | 3  | 3  | 12 | 12 | 10 | 5  | 11 | 4  | 6  | 0  | 16 | 8  | 5  | 4  | 5  |
| S  | 1  | 8  | 7   | 10 | 4  | 4  | 1  | 6  | 10 | 10 | 15 | 2  | 4  | 6  | 15 | 11 | 6  | 9  | 0  | 5  | 6  | 11 | 6  |
| T  | 7  | 4  | 16  | 8  | 1  | 12 | 5  | 2  | 8  | 8  | 14 | 3  | 1  | 2  | 13 | 9  | 1  | 6  | 6  | 0  | 2  | 9  | 2  |
| V  | 10 | 2  | 20  | 6  | 3  | 15 | 8  | 0  | 6  | 6  | 13 | 6  | 4  | 0  | 12 | 7  | 1  | 4  | 9  | 2  | 0  | 7  | 0  |
| W  | 29 | 9  | 44  | 2  | 17 | 37 | 25 | 12 | 2  | 2  | 9  | 22 | 18 | 13 | 8  | 0  | 13 | 6  | 26 | 16 | 12 | 0  | 13 |
| Y  | 10 | 2  | 19  | 6  | 2  | 15 | 7  | 0  | 6  | 6  | 13 | 6  | 3  | 0  | 12 | 8  | 0  | 4  | 8  | 2  | 0  | 8  | 0  |

Fig. 2 We show the amino acid sensitivity for 5.0 Å device. In this table, we calculate the sensitivity using one amino acid as a reference. For 5.0 Å device the M is the best one.
